# Supplementary material for: Air-stable chiral mono- and dinuclear dysprosium single-molecule magnets: steric hindrance of hexaazamacrocycles
Source: Royal Society of Chemistry journal article supplement (doi:10.1039/d2qi00754a), 2022-01-01
Supplement: d2qi00754a1.pdf [file d2qi00754a1.pdf]

Supporting Information for

## Air-stable chiral mono- and dinuclear dysprosium single-molecule magnets: steric hindrance of hexaazamacrocycles

Chen Zhao,<sup>a, b</sup> Zhenhua Zhu,<sup>\*a, c</sup> Xiao-Lei Li,<sup>a</sup> and Jinkui Tang<sup>a, b</sup>

<sup>a</sup> State Key Laboratory of Rare Earth Resource Utilization, Changchun Institute of Applied Chemistry, Chinese Academy of Sciences, Changchun 130022, P. R. China.

<sup>b</sup> School of Applied Chemistry and Engineering, University of Science and Technology of China, Hefei 230026, P. R. China.

<sup>c</sup> University of Chinese Academy of Sciences, Beijing 100049, P. R. China.

\* Corresponding author

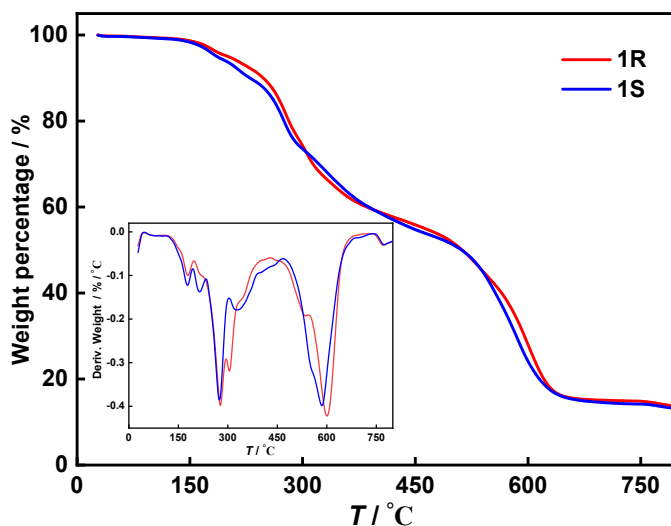

Figure S1. Thermogravimetric analyses of **1R** (red) and **1S** (blue).

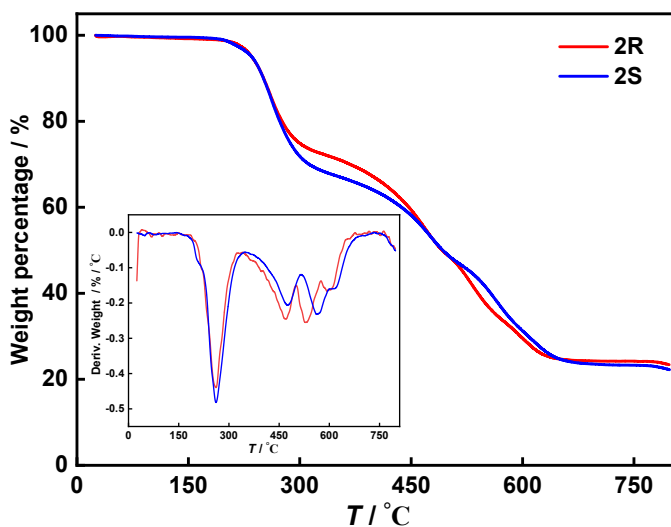

Figure S2. Thermogravimetric analyses of **2R** (red) and **2S** (blue).

**Table S1.** Crystal Data and Structure Refinement for **1R** and **1S**.

| <b>Compound reference</b>                                        | <b>1R</b>                                                        | <b>1S</b>                                                        |
|------------------------------------------------------------------|------------------------------------------------------------------|------------------------------------------------------------------|
| Chemical formula                                                 | C <sub>80</sub> H <sub>68</sub> BDyN <sub>6</sub> O <sub>2</sub> | C <sub>80</sub> H <sub>68</sub> BDyN <sub>6</sub> O <sub>2</sub> |
| Formula Mass                                                     | 1318.71                                                          | 1318.71                                                          |
| Temperature (K)                                                  | 180.0                                                            | 180.0                                                            |
| Crystal system                                                   | orthorhombic                                                     | orthorhombic                                                     |
| Space group                                                      | <i>P</i> 2 <sub>1</sub> 2 <sub>1</sub> 2 <sub>1</sub>            | <i>P</i> 2 <sub>1</sub> 2 <sub>1</sub> 2 <sub>1</sub>            |
| <i>a</i> (Å)                                                     | 15.3455(2)                                                       | 15.3363(3)                                                       |
| <i>b</i> (Å)                                                     | 16.8624(3)                                                       | 16.8363(4)                                                       |
| <i>c</i> (Å)                                                     | 30.5926(5)                                                       | 30.5645(5)                                                       |
| $\alpha$ (°)                                                     | 90                                                               | 90                                                               |
| $\beta$ (°)                                                      | 90                                                               | 90                                                               |
| $\gamma$ (°)                                                     | 90                                                               | 90                                                               |
| Unit cell volume (Å <sup>3</sup> )                               | 7908.4(2)                                                        | 7892.0(3)                                                        |
| <i>Z</i>                                                         | 4                                                                | 4                                                                |
| $\rho_{\text{calc}}$ (g/cm <sup>3</sup> )                        | 1.108                                                            | 1.110                                                            |
| $\mu$ / mm <sup>-1</sup>                                         | 0.989                                                            | 0.991                                                            |
| <i>F</i> (000)                                                   | 2708.0                                                           | 2708.0                                                           |
| Radiation                                                        | MoK $\alpha$ ( $\lambda$ = 0.71073)                              | MoK $\alpha$ ( $\lambda$ = 0.71073)                              |
| Reflections collected                                            | 58068                                                            | 58209                                                            |
| Independent reflections                                          | 13856                                                            | 13819                                                            |
| <i>R</i> <sub>int</sub>                                          | 0.0236                                                           | 0.0281                                                           |
| GOF on <i>F</i> <sup>2</sup>                                     | 1.060                                                            | 1.034                                                            |
| <i>R</i> <sub>1</sub> ( <i>I</i> $\geq$ 2 $\sigma$ ( <i>I</i> )) | 0.0327                                                           | 0.0310                                                           |
| <i>wR</i> <sub>2</sub> (all data)                                | 0.0962                                                           | 0.0876                                                           |
| Flack parameter                                                  | 0.032(3)                                                         | 0.027(3)                                                         |
| <i>CCDC number</i>                                               | 2099516                                                          | 2099517                                                          |

**Table S2.** Crystal Data and Structure Refinement for **2R** and **2S**.

| <b>Compound reference</b>                                        | <b>2R</b>                                                                                       | <b>2S</b>                                                                                       |
|------------------------------------------------------------------|-------------------------------------------------------------------------------------------------|-------------------------------------------------------------------------------------------------|
| Chemical formula                                                 | C <sub>114</sub> H <sub>116</sub> B <sub>2</sub> Dy <sub>2</sub> N <sub>12</sub> O <sub>4</sub> | C <sub>114</sub> H <sub>116</sub> B <sub>2</sub> Dy <sub>2</sub> N <sub>12</sub> O <sub>4</sub> |
| Formula Mass                                                     | 2064.80                                                                                         | 2064.80                                                                                         |
| Temperature (K)                                                  | 180.0                                                                                           | 180.0                                                                                           |
| Crystal system                                                   | monoclinic                                                                                      | monoclinic                                                                                      |
| Space group                                                      | C2                                                                                              | C2                                                                                              |
| <i>a</i> (Å)                                                     | 24.4235(7)                                                                                      | 24.4551(7)                                                                                      |
| <i>b</i> (Å)                                                     | 16.4538(5)                                                                                      | 16.4773(6)                                                                                      |
| <i>c</i> (Å)                                                     | 25.1367(7)                                                                                      | 25.1381(8)                                                                                      |
| $\alpha$ (°)                                                     | 90                                                                                              | 90                                                                                              |
| $\beta$ (°)                                                      | 103.2100(10)                                                                                    | 103.3770(10)                                                                                    |
| $\gamma$ (°)                                                     | 90                                                                                              | 90                                                                                              |
| Unit cell volume (Å <sup>3</sup> )                               | 9834.1(5)                                                                                       | 9854.7(6)                                                                                       |
| <i>Z</i>                                                         | 4                                                                                               | 4                                                                                               |
| $\rho_{\text{calc}}$ (g/cm <sup>3</sup> )                        | 1.395                                                                                           | 1.392                                                                                           |
| $\mu$ / mm <sup>-1</sup>                                         | 1.568                                                                                           | 1.565                                                                                           |
| <i>F</i> (000)                                                   | 4232.0                                                                                          | 4232.0                                                                                          |
| Radiation                                                        | MoK $\alpha$ ( $\lambda$ = 0.71073)                                                             | MoK $\alpha$ ( $\lambda$ = 0.71073)                                                             |
| Reflections collected                                            | 50009                                                                                           | 62940                                                                                           |
| Independent reflections                                          | 17293                                                                                           | 17368                                                                                           |
| <i>R</i> <sub>int</sub>                                          | 0.0296                                                                                          | 0.0407                                                                                          |
| GOF on <i>F</i> <sup>2</sup>                                     | 1.044                                                                                           | 1.067                                                                                           |
| <i>R</i> <sub>1</sub> ( <i>I</i> $\geq$ 2 $\sigma$ ( <i>I</i> )) | 0.0404                                                                                          | 0.0510                                                                                          |
| <i>wR</i> <sub>2</sub> (all data)                                | 0.1089                                                                                          | 0.1461                                                                                          |
| Flack parameter                                                  | 0.002(5)                                                                                        | 0.006(6)                                                                                        |
| <i>CCDC number</i>                                               | 2078250                                                                                         | 2078251                                                                                         |

**Table S3.** Selected bond distances (Å) for complexes **1R** and **1S**.

| <b>1R</b> |          | <b>1S</b> |          |
|-----------|----------|-----------|----------|
| Dy1-O1    | 2.145(4) | Dy1-O1    | 2.149(4) |
| Dy1-O2    | 2.136(4) | Dy1-O2    | 2.129(4) |
| Dy1-N1    | 2.622(5) | Dy1-N1    | 2.623(4) |
| Dy1-N2    | 2.637(4) | Dy1-N2    | 2.635(4) |
| Dy1-N3    | 2.656(4) | Dy1-N3    | 2.671(4) |
| Dy1-N4    | 2.691(5) | Dy1-N4    | 2.646(4) |
| Dy1-N5    | 2.647(5) | Dy1-N5    | 2.655(4) |
| Dy1-N6    | 2.632(4) | Dy1-N6    | 2.662(5) |

**Table S4.** Selected bond distances (Å) for complexes **2R** and **2S**.

| <b>2R</b>           |            | <b>2S</b>           |           |
|---------------------|------------|---------------------|-----------|
| Dy1-O1              | 2.138(6)   | Dy1-O4              | 2.2841(5) |
| Dy1-O2              | 2.2934(4)  | Dy1-O5              | 2.152(7)  |
| Dy1-O3              | 2.2825(4)  | Dy1-O3              | 2.2967(5) |
| Dy1-N1              | 2.696(8)   | Dy1-N7              | 2.649(11) |
| Dy1-N2              | 2.626(7)   | Dy1-N8              | 2.617(9)  |
| Dy1-N3              | 2.656(8)   | Dy1-N9              | 2.683(10) |
| Dy1-N4              | 2.769(8)   | Dy1-N10             | 2.619(9)  |
| Dy1-N5              | 2.635(7)   | Dy1-N11             | 2.625(9)  |
| Dy1-N6              | 2.628(8)   | Dy1-N12             | 2.760(11) |
| Dy2-O4              | 2.131(8)   | Dy2-O1              | 2.2808(6) |
| Dy2-O5              | 2.2835(4)  | Dy2-O2              | 2.135(12) |
| Dy2-O5 <sup>1</sup> | 2.2819(4)  | Dy2-O1 <sup>2</sup> | 2.2897(6) |
| Dy2-N7              | 2.611(11)  | Dy2-N1              | 2.616(14) |
| Dy2-N8              | 2.750(9)   | Dy2-N2              | 2.625(9)  |
| Dy2-N9              | 2.635(12)  | Dy2-N3              | 2.753(13) |
| Dy2-N10             | 2.6604(10) | Dy2-N4              | 2.601(14) |
| Dy2-N11             | 2.745(9)   | Dy2-N5              | 2.686(13) |
| Dy2-N12             | 2.687(10)  | Dy2-N6              | 2.749(12) |

<sup>1</sup>2-X, +Y, -Z; <sup>2</sup>1-X, +Y, -Z

**Table S5.** Selected bond angles (°) for complexes **1R** and **1S**.

|           | <b>1R</b>  |           | <b>1S</b>  |
|-----------|------------|-----------|------------|
| O1-Dy1-O2 | 170.45(17) | O1-Dy1-O2 | 170.05(16) |
| O1-Dy1-N1 | 85.59(16)  | O1-Dy1-N1 | 85.82(15)  |
| O1-Dy1-N2 | 82.70(15)  | O1-Dy1-N2 | 82.88(14)  |
| O1-Dy1-N3 | 87.22(16)  | O1-Dy1-N3 | 87.61(15)  |
| O1-Dy1-N4 | 81.59(16)  | O1-Dy1-N4 | 92.19(15)  |
| O1-Dy1-N5 | 103.09(16) | O1-Dy1-N5 | 103.40(15) |
| O1-Dy1-N6 | 92.55(16)  | O1-Dy1-N6 | 81.25(15)  |
| O2-Dy1-N1 | 98.57(17)  | O2-Dy1-N1 | 98.44(16)  |
| O2-Dy1-N2 | 93.13(16)  | O2-Dy1-N2 | 92.79(14)  |
| O2-Dy1-N3 | 98.31(17)  | O2-Dy1-N3 | 98.21(16)  |
| O2-Dy1-N4 | 92.84(17)  | O2-Dy1-N4 | 77.90(15)  |
| O2-Dy1-N5 | 86.42(16)  | O2-Dy1-N5 | 86.50(15)  |
| O2-Dy1-N6 | 77.94(17)  | O2-Dy1-N6 | 92.99(16)  |
| N1-Dy1-N2 | 168.26(15) | N1-Dy1-N2 | 168.69(14) |
| N1-Dy1-N3 | 117.67(14) | N1-Dy1-N3 | 117.76(13) |
| N1-Dy1-N4 | 61.12(14)  | N1-Dy1-N4 | 120.88(14) |
| N1-Dy1-N5 | 61.02(14)  | N1-Dy1-N5 | 60.91(13)  |
| N1-Dy1-N6 | 121.15(15) | N1-Dy1-N6 | 60.47(13)  |
| N2-Dy1-N3 | 61.06(13)  | N2-Dy1-N3 | 61.36(12)  |
| N2-Dy1-N4 | 117.55(14) | N2-Dy1-N4 | 60.29(13)  |
| N2-Dy1-N5 | 121.11(14) | N2-Dy1-N5 | 121.46(13) |
| N2-Dy1-N6 | 60.41(14)  | N2-Dy1-N6 | 117.91(13) |
| N3-Dy1-N4 | 168.80(15) | N3-Dy1-N4 | 121.17(13) |
| N3-Dy1-N5 | 60.80(14)  | N3-Dy1-N5 | 60.89(13)  |
| N3-Dy1-N6 | 120.98(14) | N3-Dy1-N6 | 168.80(14) |
| N4-Dy1-N5 | 121.29(14) | N4-Dy1-N5 | 164.40(15) |
| N4-Dy1-N6 | 60.45(14)  | N4-Dy1-N6 | 60.86(13)  |
| N5-Dy1-N6 | 164.36(15) | N5-Dy1-N6 | 120.58(13) |

**Table S6.** Selected bond angles (°) for complexes **2R** and **2S**.

| <b>2R</b>               |             | <b>2S</b>               |             |
|-------------------------|-------------|-------------------------|-------------|
| Dy1-O2-Dy1 <sup>1</sup> | 113.051(17) | Dy1-O3-Dy1 <sup>1</sup> | 112.91(2)   |
| Dy1-O3-Dy1 <sup>1</sup> | 113.884(17) | Dy1-O4-Dy1 <sup>3</sup> | 113.872(2)  |
| Dy2-O5-Dy2 <sup>2</sup> | 113.749(12) | Dy2-O1-Dy2 <sup>4</sup> | 113.710(16) |
| O1-Dy1-O2               | 145.7(3)    | O5-Dy1-O3               | 145.6(3)    |
| O1-Dy1-O3               | 147.7(3)    | O5-Dy1-O4               | 147.7(3)    |
| O4-Dy2-O5               | 145.76(19)  | O2-Dy2-O1               | 147.7(3)    |
| O4-Dy2-O5 <sup>2</sup>  | 147.96(19)  | O2-Dy2-O1 <sup>4</sup>  | 146.0(3)    |
| O1-Dy1-N1               | 79.9(3)     | O5-Dy1-N7               | 78.0(4)     |
| O1-Dy1-N2               | 94.5(2)     | O5-Dy1-N8               | 94.5(3)     |
| O1-Dy1-N3               | 78.1(3)     | O5-Dy1-N9               | 79.6(4)     |
| O1-Dy1-N4               | 78.2(3)     | O5-Dy1-N10              | 76.7(4)     |
| O1-Dy1-N5               | 93.5(2)     | O5-Dy1-N11              | 93.8(3)     |
| O1-Dy1-N6               | 76.5(3)     | O5-Dy1-N12              | 78.5(4)     |
| O4-Dy2-N7               | 93.0(4)     | O2-Dy2-N1               | 94.3(5)     |
| O4-Dy2-N8               | 78.4(3)     | O2-Dy2-N2               | 77.4(4)     |
| O4-Dy2-N9               | 77.6(4)     | O2-Dy2-N3               | 78.4(4)     |
| O4-Dy2-N10              | 94.4(4)     | O2-Dy2-N4               | 93.0(5)     |
| O4-Dy2-N11              | 79.6(3)     | O2-Dy2-N5               | 76.6(4)     |
| O4-Dy2-N12              | 76.7(3)     | O2-Dy2-N6               | 79.6(4)     |
| N1-Dy1-N2               | 60.6(2)     | N1-Dy2-N2               | 62.1(4)     |
| N2-Dy1-N3               | 60.9(2)     | N2-Dy2-N3               | 61.3(5)     |
| N3-Dy1-N4               | 60.3(2)     | N3-Dy2-N4               | 59.8(5)     |
| N4-Dy1-N5               | 59.9(2)     | N4-Dy2-N5               | 60.9(4)     |
| N5-Dy1-N6               | 61.7(2)     | N5-Dy2-N6               | 59.3(4)     |
| N6-Dy1-N1               | 61.0(2)     | N6-Dy2-N1               | 60.4(4)     |
| N7-Dy2-N8               | 59.6(3)     | N7-Dy1-N8               | 60.9(3)     |
| N8-Dy2-N9               | 61.4(4)     | N8-Dy1-N9               | 60.6(3)     |
| N9-Dy2-N10              | 62.0(4)     | N9-Dy1-N10              | 61.1(3)     |
| N10-Dy2-N11             | 60.4(3)     | N10-Dy1-N11             | 61.6(3)     |
| N11-Dy2-N12             | 59.8(3)     | N11-Dy1-N12             | 59.9(3)     |
| N12-Dy2-N7              | 60.6(3)     | N12-Dy1-N7              | 60.2(3)     |

<sup>1</sup>2-X, +Y, 1-Z; <sup>2</sup>2-X, +Y, -Z; <sup>3</sup>1-X, +Y, -Z; <sup>4</sup>1-X, +Y, 1-Z

**Table S7.** The CShM values calculated by SHAPE 2.1 for **1R** and **2R**.<sup>1,2</sup>

| Central atom | Coordination Geometry                                   | 1R           | 1S           |
|--------------|---------------------------------------------------------|--------------|--------------|
| Dy           | Octagon ( $D_{8h}$ )                                    | 31.332       | 31.270       |
|              | Heptagonal pyramid ( $C_{7v}$ )                         | 21.137       | 20.983       |
|              | Hexagonal bipyramid ( $D_{6h}$ )                        | <b>1.860</b> | <b>1.858</b> |
|              | Cube ( $O_h$ )                                          | 10.189       | 10.198       |
|              | Square antiprism ( $D_{4d}$ )                           | 16.094       | 16.117       |
|              | Triangular dodecahedron ( $D_{2d}$ )                    | 13.426       | 13.407       |
|              | Johnson gyrobifastigium J26 ( $D_{2d}$ )                | 6.568        | 6.590        |
|              | Johnson elongated triangular bipyramid J14 ( $D_{3h}$ ) | 23.392       | 23.461       |
|              | Biaugmented trigonal prism J50 ( $C_{2v}$ )             | 14.540       | 14.550       |
|              | Biaugmented trigonal prism ( $C_{2v}$ )                 | 14.195       | 14.156       |
|              | Snub diphenoid J84 ( $D_{2d}$ )                         | 14.967       | 15.013       |
|              | Triakis tetrahedron ( $T_d$ )                           | 10.999       | 10.977       |
|              | Elongated trigonal bipyramid ( $D_{3h}$ )               | 20.999       | 21.000       |

**Table S8.** The CShM values calculated by SHAPE 2.1 for **2R** and **2S**.<sup>1,2</sup>

| Coordination Geometry                           | 2R           |              | 2S           |              |
|-------------------------------------------------|--------------|--------------|--------------|--------------|
|                                                 | Dy1          | Dy2          | Dy1          | Dy2          |
| Enneagon ( $D_{9h}$ )                           | 32.298       | 32.244       | 32.242       | 32.179       |
| Octagonal pyramid ( $C_{8v}$ )                  | 22.067       | 22.002       | 22.016       | 22.105       |
| Heptagonal bipyramid ( $D_{7h}$ )               | 15.106       | 14.517       | 15.053       | 14.599       |
| Johnson triangular cupola J3 ( $C_{3v}$ )       | 14.438       | 14.559       | 14.485       | 14.541       |
| Capped cube J8 ( $C_{4v}$ )                     | 7.516        | 7.641        | 7.529        | 7.617        |
| Spherical-relaxed capped cube ( $C_{4v}$ )      | 6.764        | 7.010        | 6.743        | 7.001        |
| Capped square antiprism J10 ( $C_{4v}$ )        | 8.304        | 8.310        | 8.244        | 8.329        |
| Spherical capped square antiprism ( $C_{4v}$ )  | 7.375        | 7.291        | 7.316        | 7.297        |
| Tricapped trigonal prism J51 ( $D_{3h}$ )       | 7.709        | 7.627        | 7.671        | 7.633        |
| Spherical tricapped trigonal prism ( $D_{3h}$ ) | 8.458        | 8.403        | 8.382        | 8.403        |
| Tridiminished icosahedron J63 ( $C_{3v}$ )      | 9.352        | 9.705        | 9.373        | 9.645        |
| Hula-hoop ( $C_{2v}$ )                          | <b>2.561</b> | <b>2.736</b> | <b>2.512</b> | <b>2.749</b> |
| Muffin ( $C_s$ )                                | 5.654        | 5.580        | 5.591        | 5.578        |

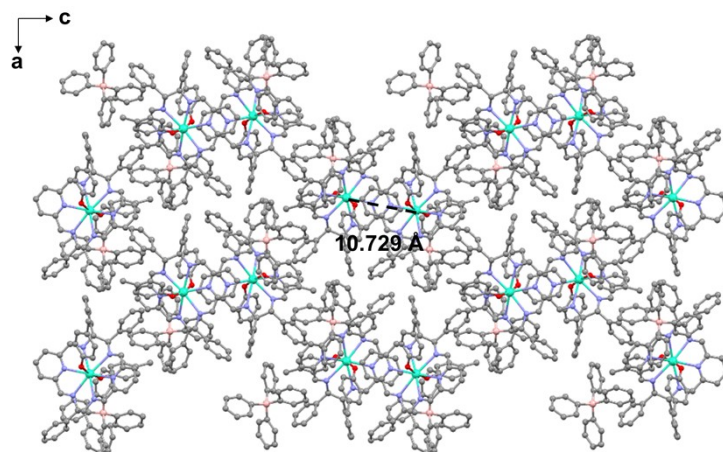

**Figure S3.** The packing diagram for **1R** shown along the crystallographic *b* axis gives the shortest intermolecular Dy···Dy distance of 10.729 Å.

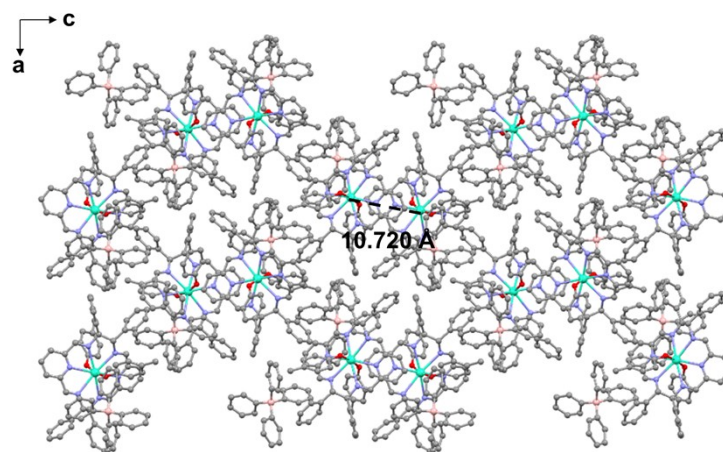

**Figure S4.** The packing diagram for **1S** shown along the crystallographic *b* axis gives the shortest intermolecular Dy···Dy distance of 10.720 Å.

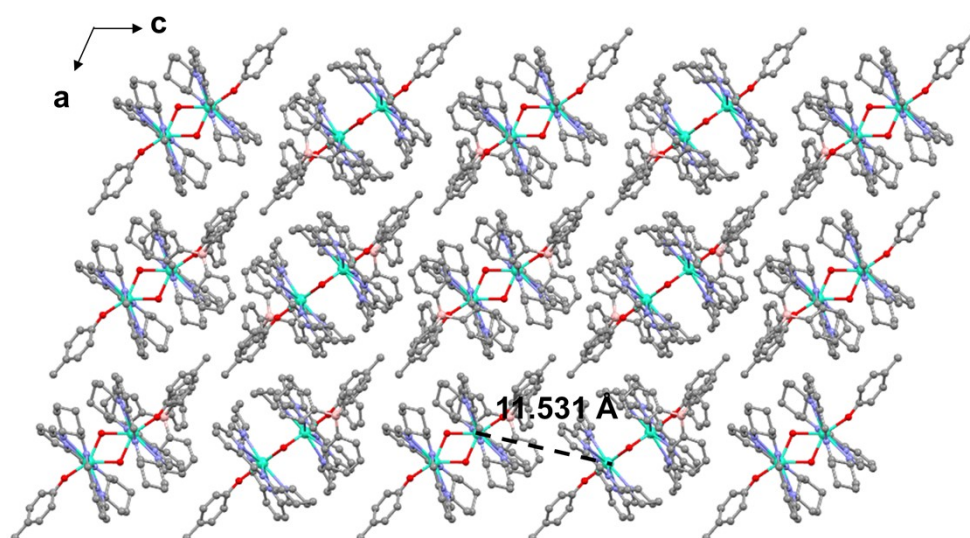

**Figure S5.** The packing diagram for **2R** shown along the crystallographic *b* axis gives the shortest intermolecular Dy···Dy distance of 11.531 Å.



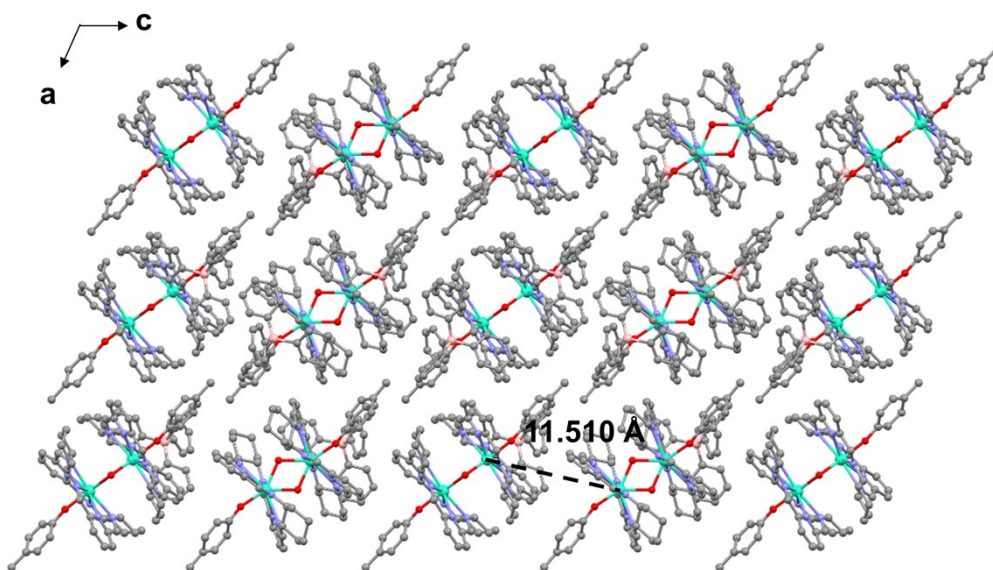

**Figure S6.** The packing diagram for **2S** shown along the crystallographic *b* axis gives the shortest intermolecular Dy...Dy distance of 11.510 Å.

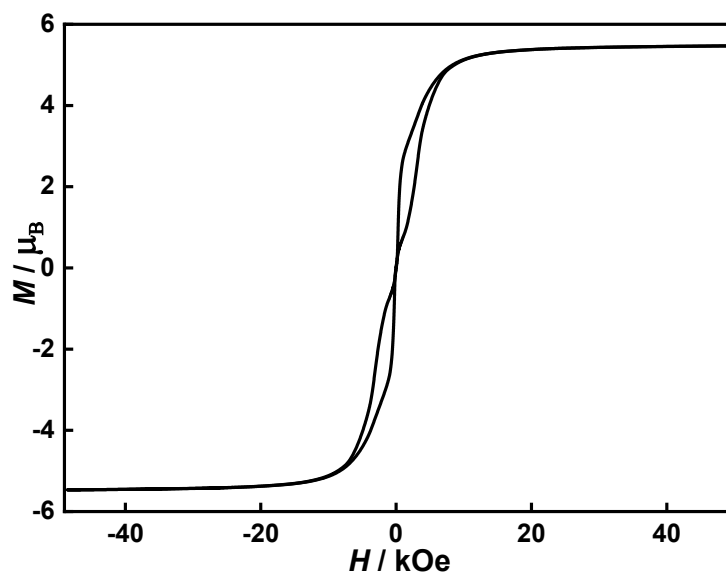

**Figure S7.** Magnetic hysteresis loop for **1R**. The data were collected at 1.9 K using an average field sweep speed of 31 Oe s<sup>-1</sup>.

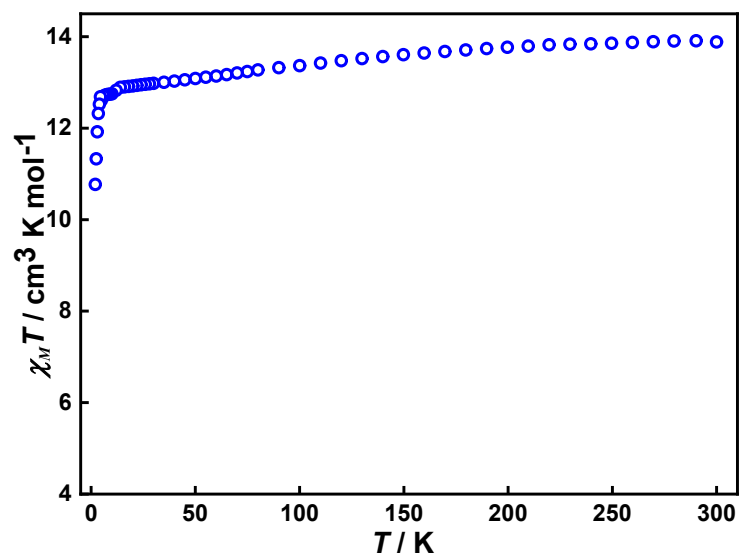

**Figure S8.** Plots of  $\chi_M T$  versus temperature for **1S** in an applied magnetic field of 1 kOe.  $\chi_M T$  (300 K) = 13.88 cm<sup>3</sup> K mol<sup>-1</sup>,  $\chi_M T$  (2 K) = 10.77 cm<sup>3</sup> K mol<sup>-1</sup>.

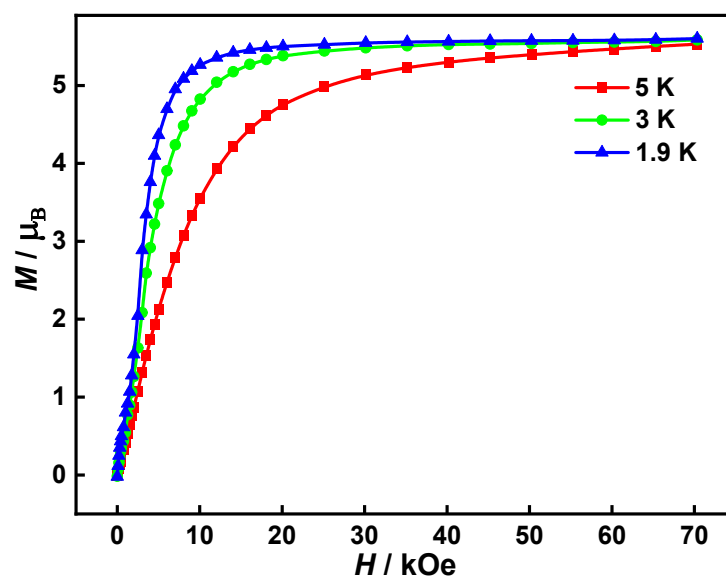

**Figure S9.** Field dependence of the magnetization at 1.9 K, 3 K and 5 K for **1S**.  $M = 5.60 \mu_B$  at 1.9 K and 70 kOe.

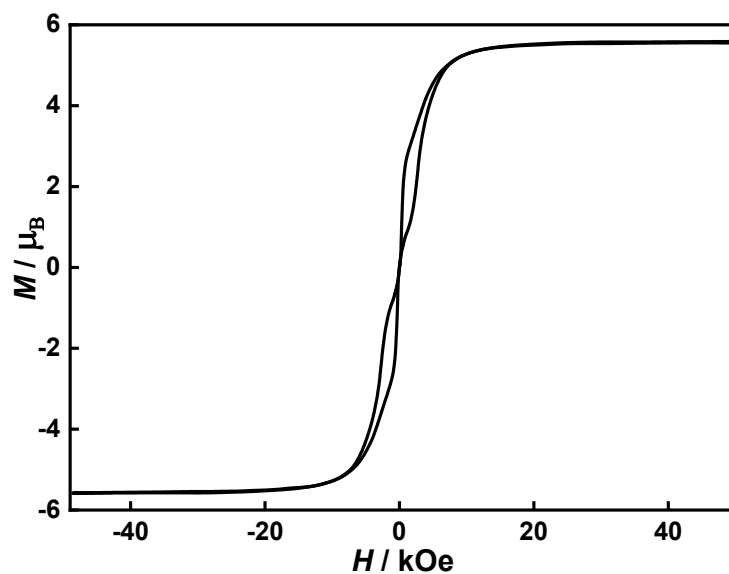

**Figure S10.** Magnetic hysteresis loop for **1S**. The data were collected at 1.9 K using an average field sweep speed of 31 Oe s<sup>-1</sup>.

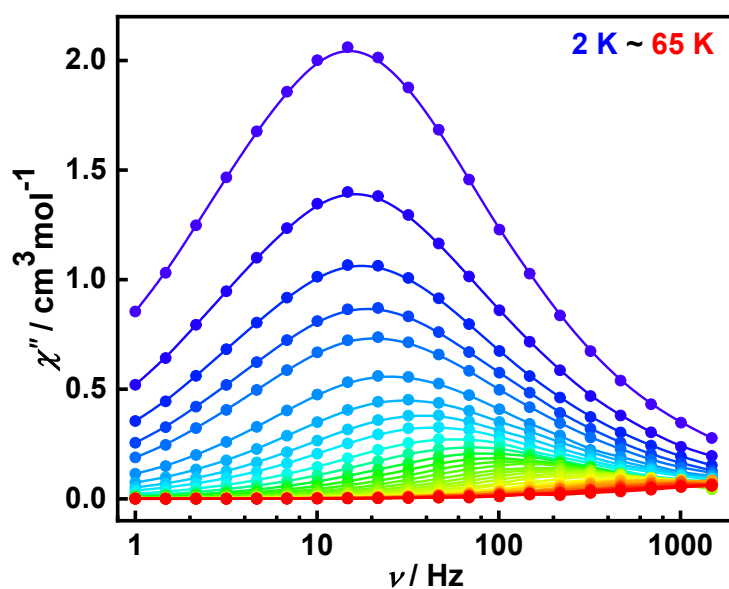

**Figure S11.** Frequency dependence of the out-of-phase susceptibility ( $\chi''$ ) for **1S** in zero DC field at AC frequencies of 1-1488 Hz in the temperature range of 2 to 65 K.

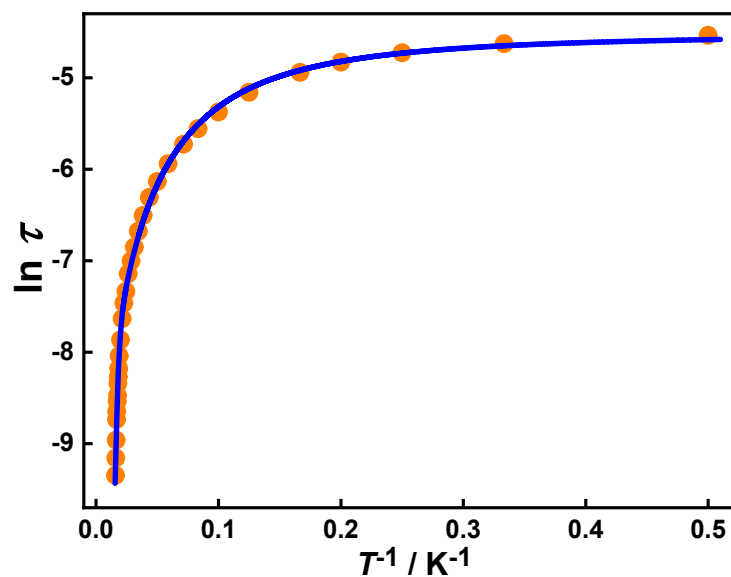

**Figure S12.** Temperature dependence of the relaxation time in the form of natural logarithm for **1S**. The blue line represents the fitting. The fitting equation is  $\ln(\tau) = -\ln[CT^n + \tau_0^{-1} \exp(-U_{\text{eff}}/k_B T) + 1/\tau_{\text{QTM}}]$ , giving  $U_{\text{eff}} = 533(11) \text{ cm}^{-1}$ ,  $\tau_0 = 6.8(3) \times 10^{-10} \text{ s}$ ,  $C = 1.9(2) \text{ s}^{-1} \text{ K}^{-n}$ ,  $n = 1.78(4)$ ,  $\tau_{\text{QTM}} = 1.09(4) \times 10^{-2} \text{ s}$ .

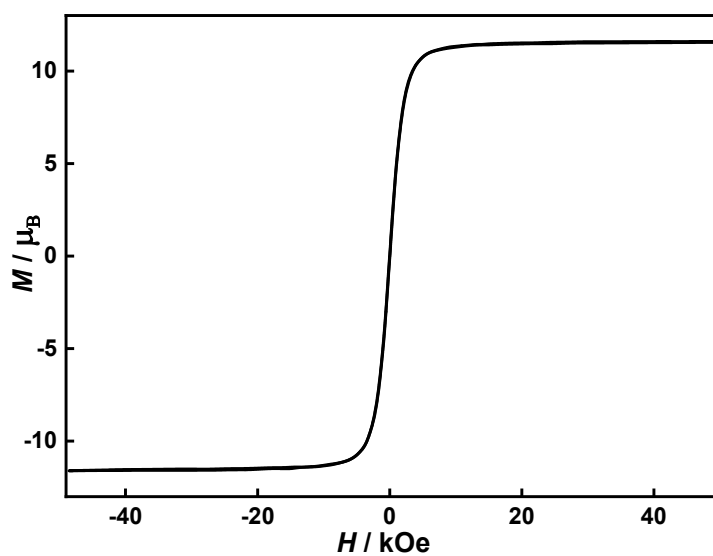

**Figure S13.** Magnetic hysteresis loop for **2R**. The data were collected at 1.9 K using an average field sweep speed of  $31 \text{ Oe s}^{-1}$ .

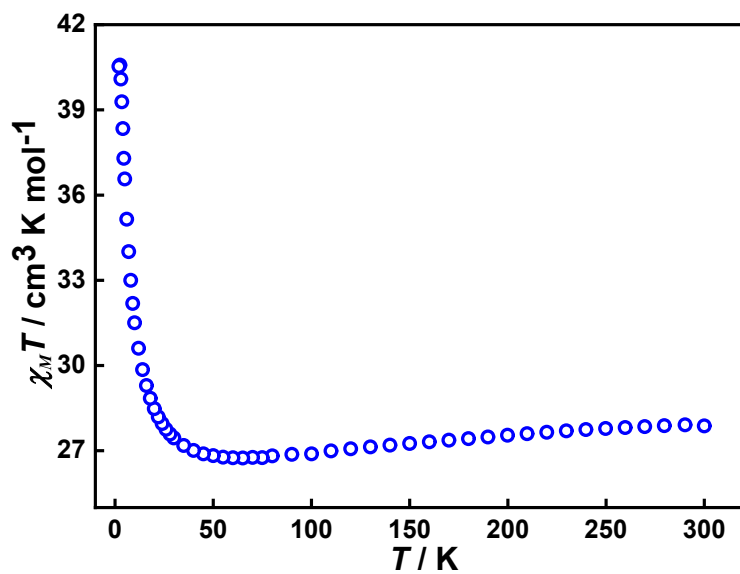

**Figure S14.** Plots of  $\chi_M T$  versus  $T$  for **2S** in an applied magnetic field of 1 kOe.  $\chi_M T$  (300 K) = 24.61 cm<sup>3</sup> K mol<sup>-1</sup>,  $\chi_M T$  (75 K) = 27.87 cm<sup>3</sup> K mol<sup>-1</sup>,  $\chi_M T$  (2 K) = 40.53 cm<sup>3</sup> K mol<sup>-1</sup>.

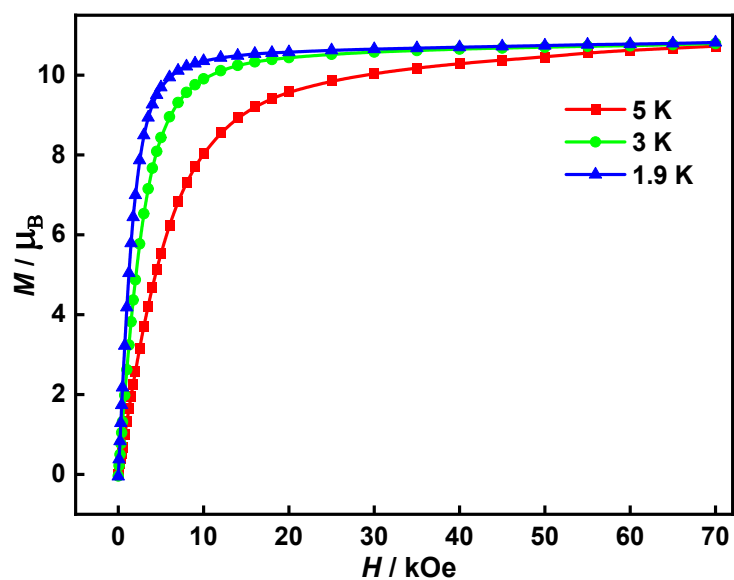

**Figure S15.** Field dependence of the magnetization at 1.9 K, 3 K and 5 K for **2S**.  $M = 10.82 \mu_B$  at 1.9 K and 70 kOe.

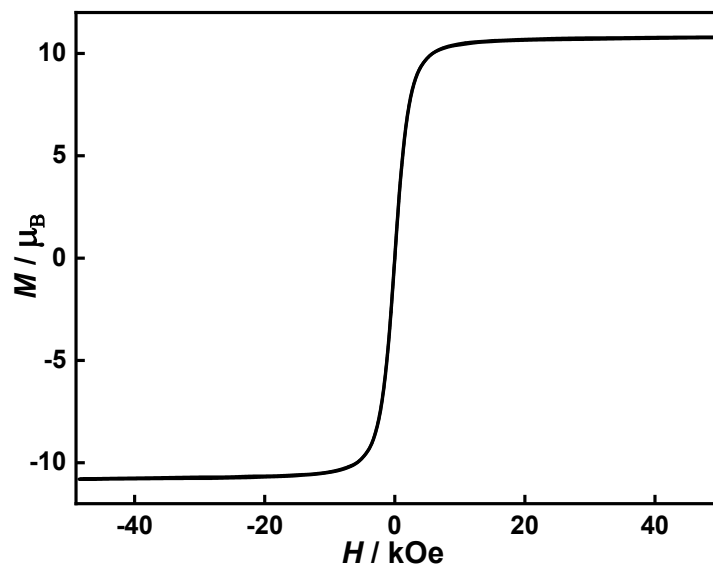

**Figure S16.** Magnetic hysteresis loop for **2S**. The data were collected at 1.9 K using an average field sweep speed of 31 Oe s<sup>-1</sup>.

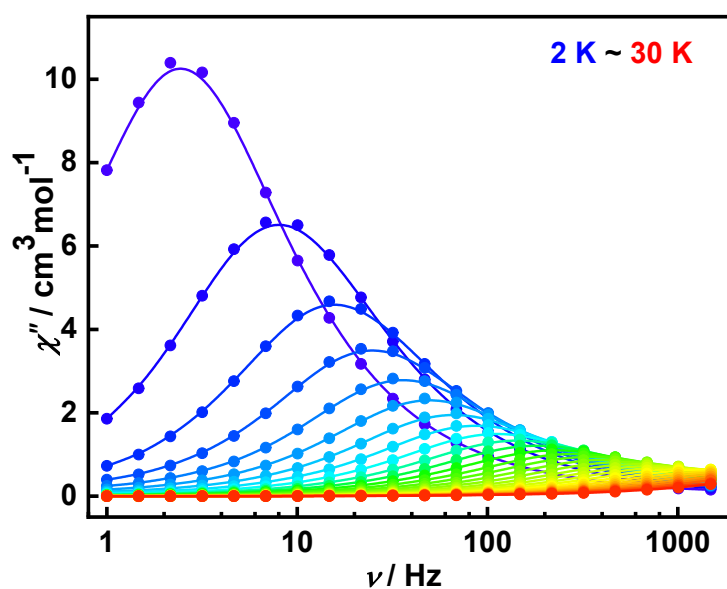

**Figure S17.** Frequency dependence of the out-of-phase susceptibility ( $\chi''$ ) for **2S** in zero DC field at AC frequencies of 1-1488 Hz in the temperature range of 2 to 30 K.

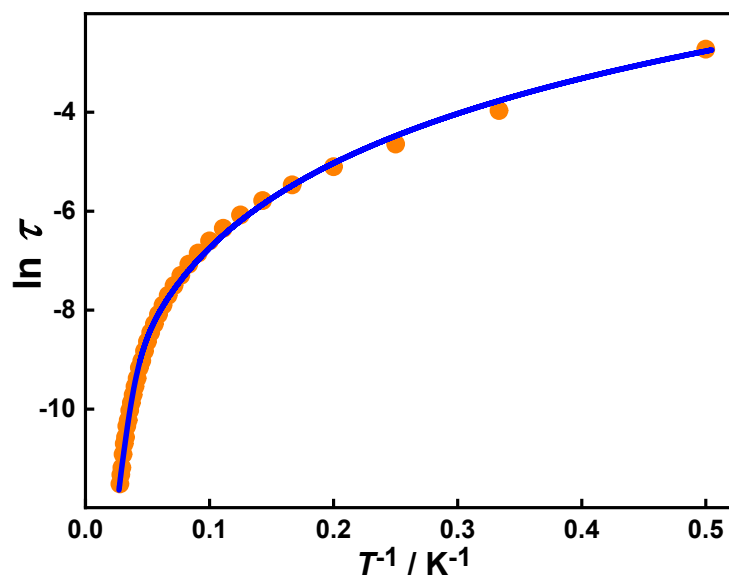

**Figure S18.** Temperature dependence of the relaxation time in the form of natural logarithm for **2S**. The blue line represents the fitting. The fitting equation is  $\ln(\tau) = -\ln[CT^n + \tau_0^{-1}\exp(-U_{\text{eff}}/k_B T)]$ , giving  $U_{\text{eff}} = 160(13) \text{ cm}^{-1}$ ,  $\tau_0 = 2.1(1) \times 10^{-8} \text{ s}$ ,  $C = 2.9(2) \text{ s}^{-1} \text{ K}^{-n}$ ,  $n = 2.47(3)$ .

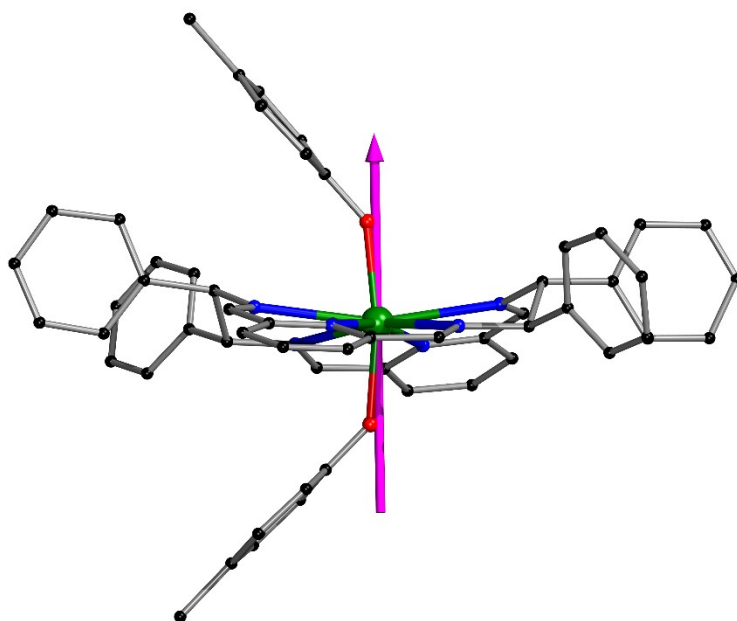

**Figure S19.** Ground-state magnetic anisotropy of complex **1R**. The pink line represents the orientation of the anisotropy axis for  $\text{Dy}^{\text{III}}$  ion.<sup>3</sup>

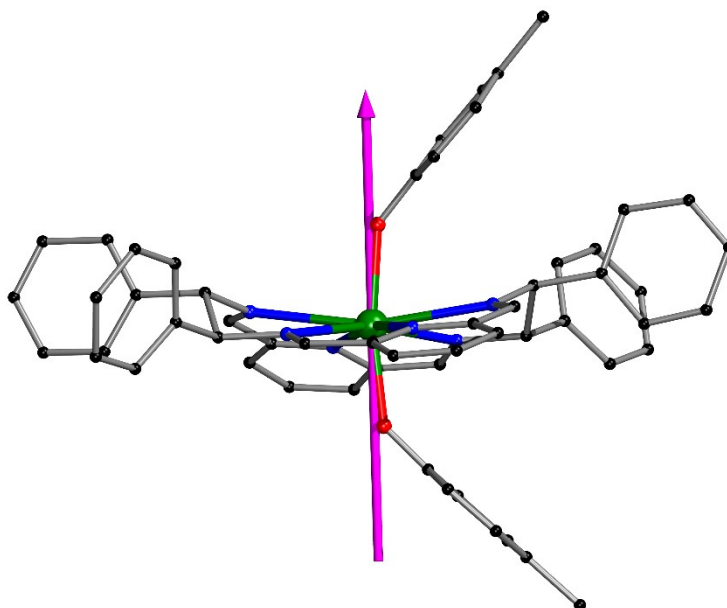

**Figure S20.** Ground-state magnetic anisotropy of complex **1S**. The pink line represents the orientation of the anisotropy axis for Dy<sup>III</sup> ion.<sup>3</sup>

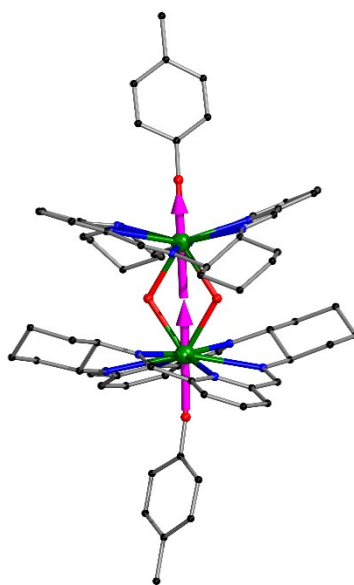

**Figure S21.** Ground-state magnetic anisotropy of complex **2R**. The pink lines represent the orientations of the anisotropy axes for Dy<sup>III</sup> ions.<sup>3</sup>



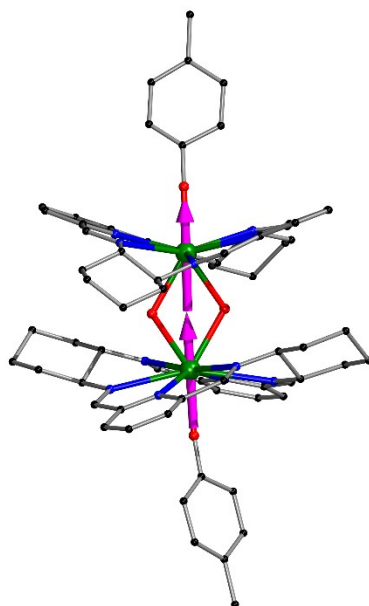

**Figure S22.** Ground-state magnetic anisotropy of complex **2S**. The pink lines represent the orientations of the anisotropy axes for Dy<sup>III</sup> ions.<sup>3</sup>

#### Reference

1. M. Pinsky and D. Avnir, Continuous Symmetry Measures. 5. The Classical Polyhedra, *Inorg. Chem.*, 1998, **37**, 5575-5582.
2. D. Casanova, J. Cirera, M. Llunell, P. Alemany, D. Avnir and S. Alvarez, Minimal Distortion Pathways in Polyhedral Rearrangements, *J. Am. Chem. Soc.*, 2004, **126**, 1755-1763.
3. N. F. Chilton, D. Collison, E. J. L. McInnes, R. E. P. Winpenny and A. Soncini, An electrostatic model for the determination of magnetic anisotropy in dysprosium complexes, *Nat. Commun.*, 2013, **4**, 2551.
